# Supplementary material for: Importance of different parameterization changes for the updated dust cycle modelling in the Community Atmosphere Model (version 6.1)
Source: Copernicus journal article supplement (doi:10.5194/gmd-2022-31), 2022-02-25
Supplement: Supplementary file [file gmd-2022-31-AC1-supplement.pdf]

Dear Juan A. Añel,

Thanks for your notice!

We have archived the materials used for our study, including the model results, observations, and model code in Zenodo with an assigned DOI:10.5281/zenodo.6989502.

We have also revised the 'Code and Data Availability' section accordingly, removing from the text the mentions to GitHub and providing a link to the Zenodo repository.

Best regards,  
Longlei
